# Supplementary material for: Improved sodium-ion storage performance of TiO2nanotubes by Ni2+doping
Source: Royal Society of Chemistry journal article supplement (doi:10.1039/c6ta04906k), 2016-01-01
Supplement: c6ta04906k1.pdf [file c6ta04906k1.pdf]

## Electronic Supplementary information

### Improved sodium-ion storage performance in TiO<sub>2</sub> nanotubes by Ni<sup>2+</sup> doping

Dong Yan, Caiyan Yu, Dongsheng Li, Xiaojie Zhang, Jiabao Li, Ting Lu\*, Likun

Pan\*

*<sup>a</sup> Engineering Research Center for Nanophotonics & Advanced Instrument, Ministry  
of Education, School of Physics and Materials Science, East China Normal University,*

*Shanghai 200062, China.*

*\* Corresponding author. Tel: +86 21 62234132; Fax: +86 21 62234321. E-mail:*

*[lkpan@phy.ecnu.edu.cn](mailto:lkpan@phy.ecnu.edu.cn) (Likun Pan); [tlu@phy.ecnu.edu.cn](mailto:tlu@phy.ecnu.edu.cn) (Ting Lu)*

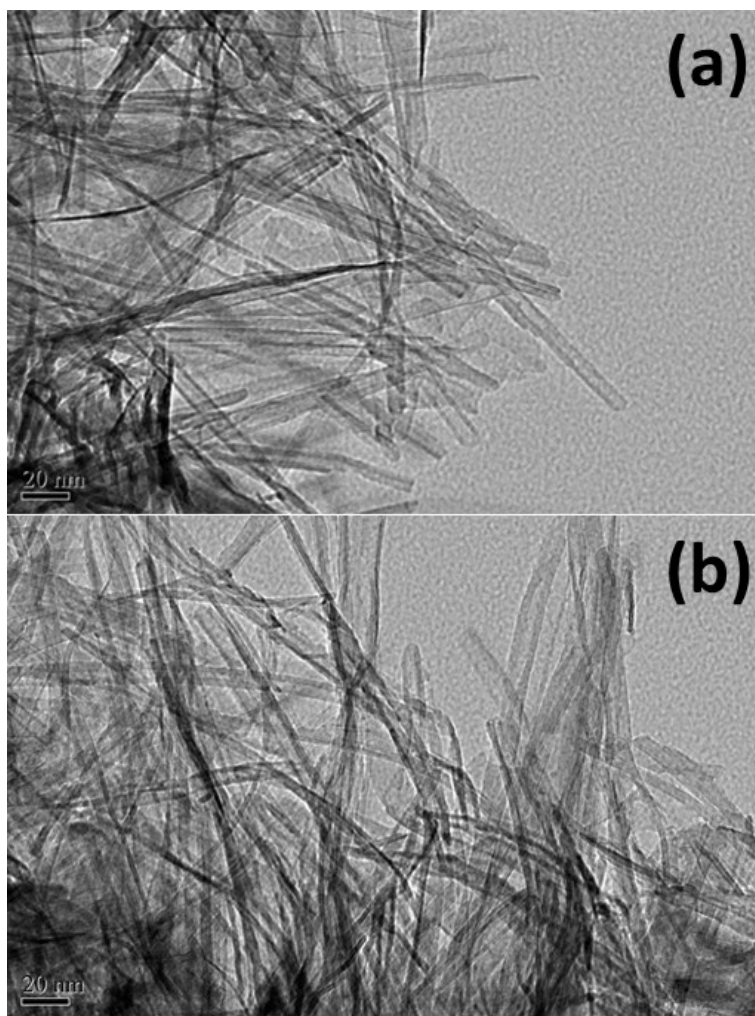

**Fig. S1** TEM images of (a) TNTs and (b) NTNTs-2.

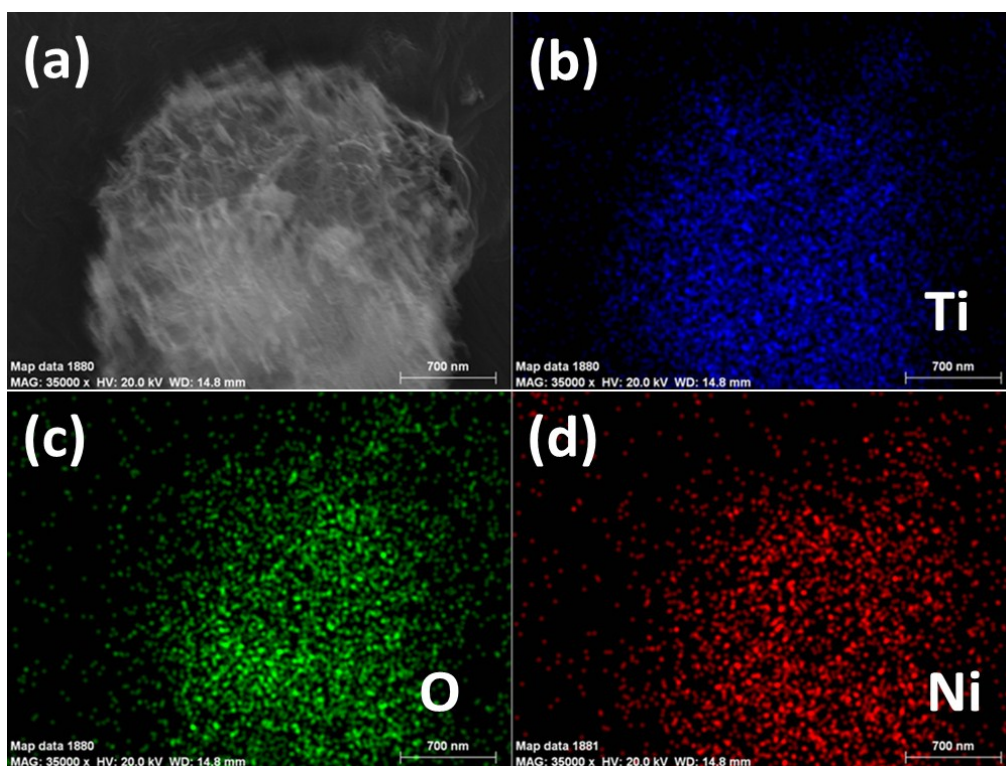

**Fig. S2** SEM image of NTNTs-2 (a) and corresponding EDS mapping images of Ti (b), O (c) and Ni (d).

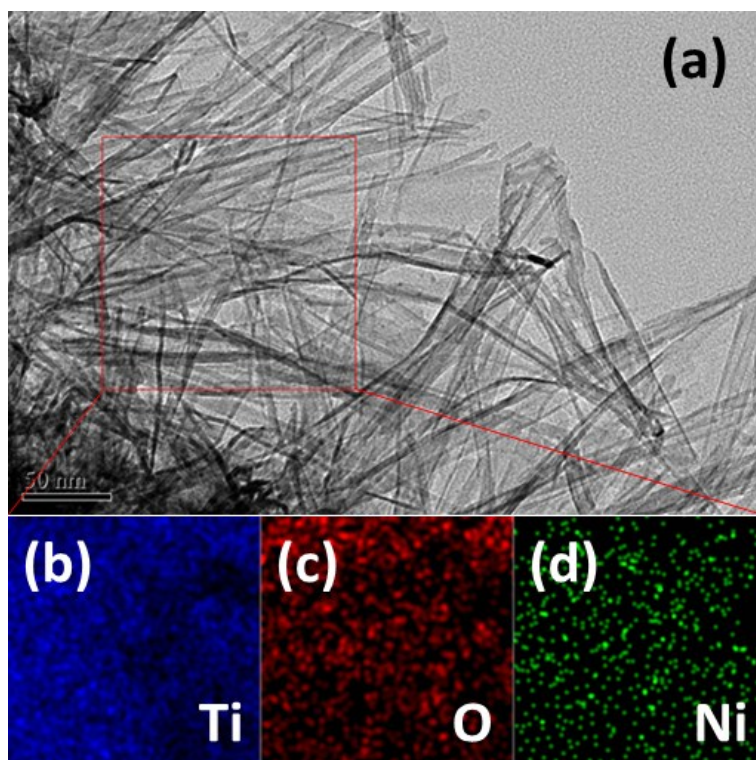

**Fig. S3** TEM image of NTNTs-2 (a) and corresponding EDS mapping images of Ti (b), O (c) and Ni (d) in the area marked in (a).

Table S1 Comparison of the performance of NTNTs-2 with reported TiO<sub>2</sub> for SIBs, tested in half cell.

| Sample                                                   | Potential range (V vs. Na/Na <sup>+</sup> ) | Charge capacity at low current density                                                        | Rate performance (charge capacity)                                                                                                                                                                                                                                | Long-term cycling Stability (charge capacity)                                |
|----------------------------------------------------------|---------------------------------------------|-----------------------------------------------------------------------------------------------|-------------------------------------------------------------------------------------------------------------------------------------------------------------------------------------------------------------------------------------------------------------------|------------------------------------------------------------------------------|
| <b>NTNTs-2 (This work)</b>                               | 0.005-3V                                    | 286 mAh g <sup>-1</sup> at 50 mA g <sup>-1</sup> after 100 cycles                             | 286 mAh g <sup>-1</sup> at 50 mA g <sup>-1</sup><br>247 mAh g <sup>-1</sup> at 250mA g <sup>-1</sup><br>214 mAh g <sup>-1</sup> at 1A g <sup>-1</sup><br>165 mAh g <sup>-1</sup> at 2 A g <sup>-1</sup><br>122 mAh g <sup>-1</sup> at 5 A g <sup>-1</sup>         | 123 mA h g <sup>-1</sup> after 2000 cycles at 5 A g <sup>-1</sup>            |
| <b>N-doped graphene /TiO<sub>2</sub><sup>1</sup></b>     | 0.005-3V                                    | 250 mAh g <sup>-1</sup> at 100 mA g <sup>-1</sup> after 100 cycles                            | 400 mAh g <sup>-1</sup> at 50 mA g <sup>-1</sup><br>280 mAh g <sup>-1</sup> at 100 mA g <sup>-1</sup><br>230 mAh g <sup>-1</sup> at 300 mA g <sup>-1</sup><br>200 mAh g <sup>-1</sup> at 600 mA g <sup>-1</sup><br>175 mAh g <sup>-1</sup> at 1 A g <sup>-1</sup> | /                                                                            |
| <b>Anatase TiO<sub>2</sub> nanoparticles<sup>2</sup></b> | 0.005-3V                                    | 150 mAh g <sup>-1</sup> at 0.11C after 60 cycles (1C=369mA g <sup>-1</sup> )                  | 150 mAh g <sup>-1</sup> at 0.11 C<br>140 mAh g <sup>-1</sup> at 0.22 C<br>130 mAh g <sup>-1</sup> at 0.55 C<br>120 mAh g <sup>-1</sup> at 1.1 C<br>100 mAh g <sup>-1</sup> at 5.5 C<br>86 mAh g <sup>-1</sup> at 11 C                                             | 100 mA h g <sup>-1</sup> after 1000 cycles at 1.845 A g <sup>-1</sup> (5.5C) |
| <b>Anatase TiO<sub>2</sub> nanorodes<sup>3</sup></b>     | 0.005-3V                                    | 180 mAh g <sup>-1</sup> at 10 mA g <sup>-1</sup> after 200 cycles (1C=330mA g <sup>-1</sup> ) | 150 mAh g <sup>-1</sup> at 1 C<br>130 mAh g <sup>-1</sup> at 3 C<br>120 mAh g <sup>-1</sup> at 5 C<br>90 mAh g <sup>-1</sup> at 20 C<br>75 mAh g <sup>-1</sup> at 50 C<br>60 mAh g <sup>-1</sup> at 70 C<br>50 mAh g <sup>-1</sup> at 100 C                       | /                                                                            |
| <b>Amorphous TiO<sub>2</sub> nanotube<sup>4</sup></b>    | 0.9-2.5V                                    | 140 mAh g <sup>-1</sup> at 50 mA g <sup>-1</sup> after 15 cycles                              | /                                                                                                                                                                                                                                                                 | /                                                                            |
| <b>Anatase TiO<sub>2</sub> nanocubes<sup>5</sup></b>     | 0-2V                                        | 175 mAh g <sup>-1</sup> at 0.2 C after 40 cycles (1C=168mA g <sup>-1</sup> )                  | 174 mAh g <sup>-1</sup> at 1 C<br>158 mAh g <sup>-1</sup> at 2C<br>132 mAh g <sup>-1</sup> at 5 C<br>108 mAh g <sup>-1</sup> at 10 C<br>84 mAh g <sup>-1</sup> at 20 C<br>68 mAh g <sup>-1</sup> at 30 C<br>52 mAh g <sup>-1</sup> at 50 C                        | 160 mAh g <sup>-1</sup> after 1000 cycles at 2C                              |
| <b>Nb-doped anatase TiO<sub>2</sub><sup>6</sup></b>      | 0-2.5V                                      | 177mAh g <sup>-1</sup> at 0.1C after 100 cycles                                               | 175 mAh g <sup>-1</sup> at 0.1 C<br>165 mAh g <sup>-1</sup> at 0.2 C<br>155 mAh g <sup>-1</sup> at 0.5 C                                                                                                                                                          | /                                                                            |

|                                                                |          |                                                                                |                                                                                                                                                                                                                                                                                                                   |                                                                    |
|----------------------------------------------------------------|----------|--------------------------------------------------------------------------------|-------------------------------------------------------------------------------------------------------------------------------------------------------------------------------------------------------------------------------------------------------------------------------------------------------------------|--------------------------------------------------------------------|
|                                                                |          | (1C=330mA g <sup>-1</sup> )                                                    | 145 mAh g <sup>-1</sup> at 1 C<br>125 mAh g <sup>-1</sup> at 2 C<br>100 mAh g <sup>-1</sup> at 5 C                                                                                                                                                                                                                |                                                                    |
| <b>Anatase TiO<sub>2</sub> hollow nanospheres</b> <sup>7</sup> | 0.005-3V | 194 mAh g <sup>-1</sup> at 40 mA g <sup>-1</sup> after 500 cycles              | 250 mAh g <sup>-1</sup> at 20 mA g <sup>-1</sup><br>225 mAh g <sup>-1</sup> at 40 mA g <sup>-1</sup><br>210 mAh g <sup>-1</sup> at 160 mA g <sup>-1</sup><br>175 mAh g <sup>-1</sup> at 320 mA g <sup>-1</sup><br>125 mAh g <sup>-1</sup> at 640 mA g <sup>-1</sup>                                               | /                                                                  |
| <b>Graphene/TiO<sub>2</sub> nanofibers</b> <sup>8</sup>        | 0-2.5V   | 160 mAh g <sup>-1</sup> at 1 C after 200 cycles (1C=335mA g <sup>-1</sup> )    | 210 mAh g <sup>-1</sup> at 0.2 C<br>175 mAh g <sup>-1</sup> at 0.5 C<br>165 mAh g <sup>-1</sup> at 1 C<br>155 mAh g <sup>-1</sup> at 2 C<br>125 mAh g <sup>-1</sup> at 5 C<br>95 mAh g <sup>-1</sup> at 10 C                                                                                                      | /                                                                  |
| <b>TiO<sub>2</sub>/graphene nanocomposites</b> <sup>9</sup>    | 0.05-3V  | 265 mAh g <sup>-1</sup> at 50 mA g <sup>-1</sup> after 80 cycles               | 265 mAh g <sup>-1</sup> at 50 mA g <sup>-1</sup><br>187 mAh g <sup>-1</sup> at 200 mA g <sup>-1</sup><br>149 mAh g <sup>-1</sup> at 500 mA g <sup>-1</sup><br>125 mAh g <sup>-1</sup> at 1.5A g <sup>-1</sup><br>114 mAh g <sup>-1</sup> at 3 A g <sup>-1</sup><br>102 mAh g <sup>-1</sup> at 6 A g <sup>-1</sup> | 90 mAh g <sup>-1</sup> after 4000 cycles at 500 mA g <sup>-1</sup> |
| <b>Carbon-coated anatase TiO<sub>2</sub></b> <sup>10</sup>     | 0-2V     | 227 mAh g <sup>-1</sup> at 0.1 C after 300 cycles (1C=335 mA g <sup>-1</sup> ) | 227 mAh g <sup>-1</sup> at 0.1 C<br>215 mAh g <sup>-1</sup> at 0.2 C<br>205 mAh g <sup>-1</sup> at 0.5 C<br>195 mAh g <sup>-1</sup> at 1 C<br>175 mAh g <sup>-1</sup> at 2 C<br>155 mAh g <sup>-1</sup> at 5 C<br>135 mAh g <sup>-1</sup> at 10 C                                                                 | 175 mAh g <sup>-1</sup> after 500 cycles at 5 C                    |

## References

1. H. A. Cha, H. M. Jeong and J. K. Kang, *J. Mater. Chem. A*, 2014, **2**, 5182.
2. L. Wu, D. Buchholz, D. Bresser, L. Gomes Chagas and S. Passerini, *J. Power Sources*, 2014, **251**, 379-385.
3. K. T. Kim, G. Ali, K. Y. Chung, C. S. Yoon, H. Yashiro, Y. K. Sun, J. Lu, K. Amine and S. T. Myung, *Nano Lett.*, 2014, **14**, 416-422.
4. H. Xiong, M. D. Slater, M. Balasubramanian, C. S. Johnson and T. Rajh, *J. Phys. Chem. Lett.*, 2011, **2**, 2560-2565.
5. X. Yang, C. Wang, Y. Yang, Y. Zhang, X. Jia, J. Chen and X. Ji, *J. Mater. Chem. A*, 2015, **3**, 8800-8807.
6. F. Zhao, B. Wang, Y. Tang, H. Ge, Z. Huang and H. K. Liu, *J. Mater. Chem. A*, 2015, **3**, 22969-22974.
7. D. Su, S. Dou and G. Wang, *Chem. Mater.*, 2015, **27**, 6022-6029.
8. Y. Yeo, J. W. Jung, K. Park and I. D. Kim, *Sci. Rep.*, 2015, **5**, 13862.

9. C. Chen, Y. Wen, X. Hu, X. Ji, M. Yan, L. Mai, P. Hu, B. Shan and Y. Huang, *Nat. Commun.*, 2015, **6**, 6929.
10. M. N. Tahir, B. Oschmann, D. Buchholz, X. Dou, I. Lieberwirth, M. Panthöfer, W. Tremel, R. Zentel and S. Passerini, *Adv. Energy Mater.*, 2016, **6**, 1501489.
